# Supplementary material for: Low temperature aqueous solution-processed Li doped ZnO buffer layers for high performance inverted organic solar cells
Source: Royal Society of Chemistry journal article supplement (doi:10.1039/c6tc00760k), 2016-01-01
Supplement: c6tc00760k1.pdf [file c6tc00760k1.pdf]

Supporting Information for

# Low Temperature Aqueous Solution-Processed Li Doped ZnO Buffer Layers for High Performance Inverted Organic Solar Cells

Zhenhua Lin,<sup>1</sup> Jingjing Chang,<sup>\*,1</sup> Chunfu Zhang,<sup>\*,1</sup> Jincheng Zhang,<sup>1</sup> Jishan Wu,<sup>2</sup> and Yue Hao<sup>1</sup>

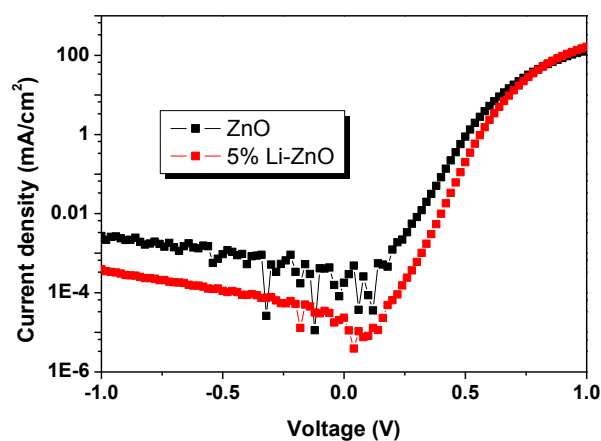

**Figure S1.** Dark J-V characteristics of the P3HT:PC<sub>61</sub>BM devices incorporating ZnO buffer layers without and with 5%Li-doping.

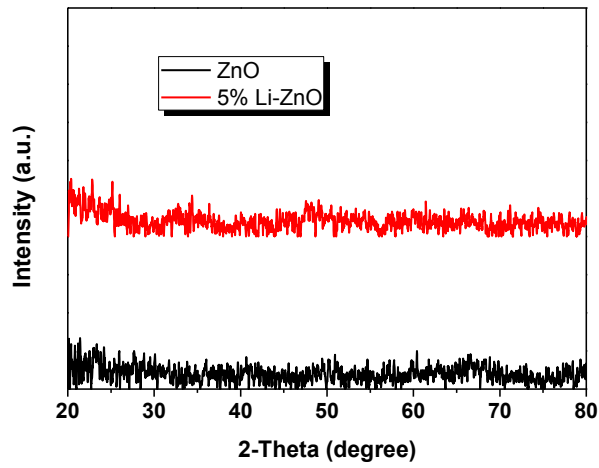

**Figure S2.** XRD spectra of ZnO thin films without and with Li doping.

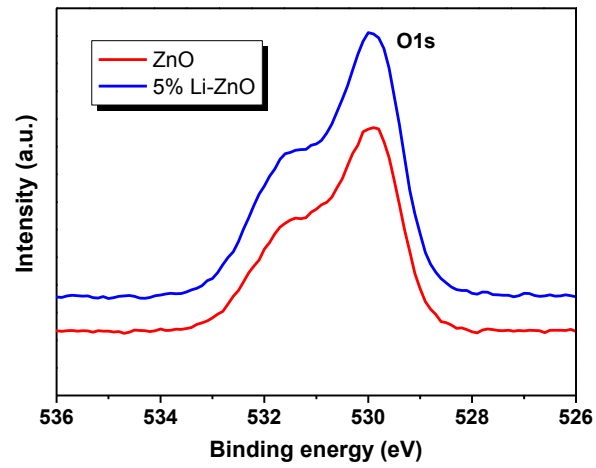

**Figure S3.** XPS spectra of O1s peak for ZnO thin films without and with Li doping.

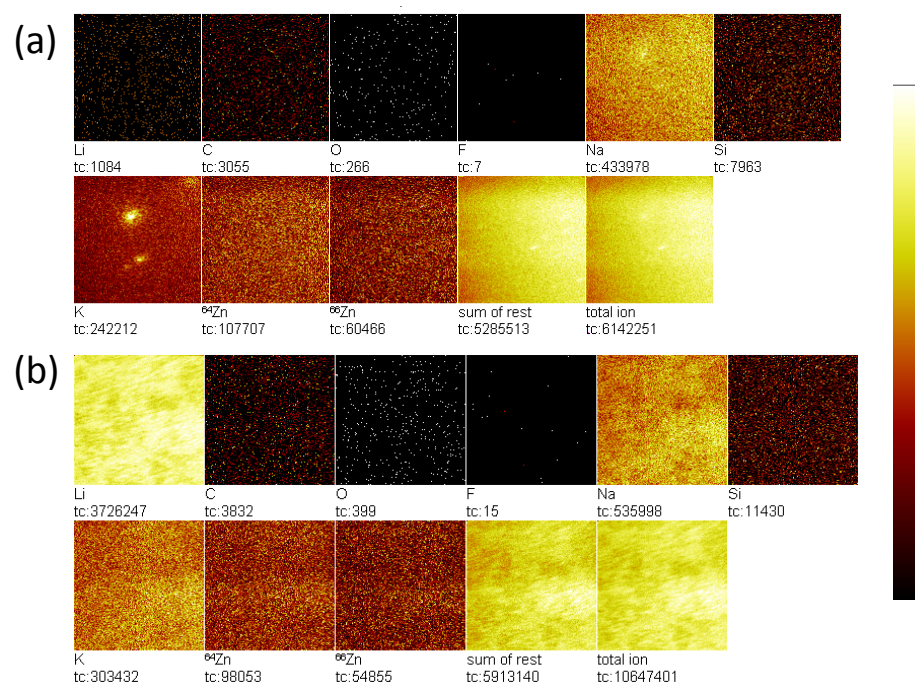

**Figure S4.** The SIMS mapping of ZnO thin films without and with 5% Li doping.
